# Supplementary material for: Canada First Nations Strengths in Community-Based Primary Healthcare
Source: MDPI journal article supplement (doi:10.3390/ijerph192013532), 2022-10-19
Supplement: s1 [file s1]

**Supplemental Table S1.** Consolidated criteria for reporting qualitative studies (COREQ): 32-item checklist.

| No                                                                         | Item                                     | Guide questions/description                                                                                                                                                                                                                                                                                                                                                |
|----------------------------------------------------------------------------|------------------------------------------|----------------------------------------------------------------------------------------------------------------------------------------------------------------------------------------------------------------------------------------------------------------------------------------------------------------------------------------------------------------------------|
| Domain 1:<br>Research team<br>& reflexivity<br>Personal<br>Characteristics |                                          |                                                                                                                                                                                                                                                                                                                                                                            |
| 1.                                                                         | Interviewer/facilitator                  | Which author/s conducted the interview or focus groups?<br><b>Grace Kyoon-Achan</b><br><b>Rachel Eni</b><br><b>Wanda Phillips-Beck</b><br><b>Local Research Assistants</b>                                                                                                                                                                                                 |
| 2.                                                                         | Credentials                              | What were the researchers' credentials?<br><b>GKA, PhD</b><br><b>RE, PhD</b><br><b>WPB, PhD</b><br><b>Local Research Assistants, Community Affiliation</b>                                                                                                                                                                                                                 |
| 3.                                                                         | Occupation                               | What was their occupation at the time of the study?<br><b>GKA – Associate Researcher</b><br><b>RE – Associate Researcher</b><br><b>WPB – Project Coordinator</b><br><b>Local research assistants – community membership</b>                                                                                                                                                |
| 4.                                                                         | Gender                                   | <b>GKA, Female</b><br><b>RE, Female</b><br><b>WPB, Female</b><br><b>Local Research Assistants, represented all genders (male, female, 2-spirit, non-binary)</b>                                                                                                                                                                                                            |
| 5.                                                                         | Experience & Training                    | What experience or training did the researcher have?<br><b>All researchers listed above had more than 10 years qualitative research experience in social sciences and community health sciences at the time of data collection for this study. The local researcher assistants had a lifetime of experience living in the communities and interacting with healthcare.</b> |
| Relationship<br>with<br>Participants                                       |                                          |                                                                                                                                                                                                                                                                                                                                                                            |
| 6.                                                                         | Relationship established                 | Was a relationship established prior to study commencement?<br><b>Yes, we visited all communities and presented the project to community leadership. We received written consent to conduct the project through Band Council Resolutions.</b>                                                                                                                              |
| 7.                                                                         | Participant knowledge of the interviewer | What did the participants know about the researchers? E.g., reasons for doing the research?<br><b>Reasons for doing the research were described prior to the interviews, i.e., collection of data from the community-level</b>                                                                                                                                             |

|                       |                                     |                                                                                                                                                                                                                                                                                                                                                                    |
|-----------------------|-------------------------------------|--------------------------------------------------------------------------------------------------------------------------------------------------------------------------------------------------------------------------------------------------------------------------------------------------------------------------------------------------------------------|
|                       |                                     | <i>to understanding strengths for primary health care transformation.</i>                                                                                                                                                                                                                                                                                          |
| 8.                    | Interviewer Characteristics         | What characteristics were reported about the interviewer/facilitators? E.g., Bias, assumptions, reasons and interests in the research topic<br><b><i>Acknowledgement of the researcher affiliations with the University of Manitoba and First Nations Health &amp; Social Secretariat of Manitoba or community membership.</i></b>                                 |
| 9.                    | Methodological Orientation & Theory | What methodological orientation was stated to underpin the study?<br><b><i>Grounded Theory and Community-based Participatory Research</i></b>                                                                                                                                                                                                                      |
| Participant Selection |                                     |                                                                                                                                                                                                                                                                                                                                                                    |
| 10.                   | Sampling                            | How were participants selected?<br><b><i>Convenience to purposive (snowballing) and then theoretically sampling sufficiency</i></b>                                                                                                                                                                                                                                |
| 11.                   | Method of Approach                  | How were the participants approached?<br><b><i>Face-to-face</i></b>                                                                                                                                                                                                                                                                                                |
| 12.                   | Sample Size                         | How many participants were in the study?<br><b><i>180 individual interviews and 5 focus groups</i></b>                                                                                                                                                                                                                                                             |
| 13.                   | Non-participation                   | How many people refused to participate or dropped out? Reasons?<br><b><i>There was zero refusal as all participants wanted their voices heard on the issues being discussed</i></b>                                                                                                                                                                                |
| 14.                   | Setting of data collection          | Where was the data collected?<br><b><i>All the data was collected in the communities, at homes, homecare settings, health centres, nursing stations or at the school. The focus groups were held at health centres or community halls.</i></b>                                                                                                                     |
| 15.                   | Presence of non-participants        | Was anyone else present besides the participants and researchers? <b><i>No</i></b>                                                                                                                                                                                                                                                                                 |
| 16.                   | Description of sample               | What are important characteristics of the sample? E.g., demographic data, date<br><b><i>First Nation community members, utilizers of healthcare in the communities. Some spoke their Indigenous languages fluently. Helped to elaborate on meaning from community perspectives.</i></b>                                                                            |
| Data collection       |                                     |                                                                                                                                                                                                                                                                                                                                                                    |
| 17.                   | Interview Guide                     | <b><i>Were questions, prompts, guides provided by the authors? Was it pilot tested? The interview guide was developed iteratively by the authors with input from community partners. Our interview guide evolved alongside our iterative analysis. This meant that as certain themes reached sufficiency, we modified our prompts to explore discrepancies</i></b> |

|                                       |                                |                                                                                                                                                                                                                                                                                                                     |
|---------------------------------------|--------------------------------|---------------------------------------------------------------------------------------------------------------------------------------------------------------------------------------------------------------------------------------------------------------------------------------------------------------------|
|                                       |                                | <i>to further enrich the analysis. Yes, the interview guide was pilot tested.</i>                                                                                                                                                                                                                                   |
| 18.                                   | Repeat interviews              | Were repeat interviews carried out? If yes, how many?<br><b><i>We did not repeat any interviews.</i></b>                                                                                                                                                                                                            |
| 19.                                   | Audio/visual recording         | Did the research use audio or video recording to collect the data? <b><i>All interviews were audio-recorded, transcribed verbatim, and de-identified prior to analysis.</i></b>                                                                                                                                     |
| 20.                                   | Field notes                    | Were field notes made during and/or after the interview or focus groups? Yes                                                                                                                                                                                                                                        |
| 21.                                   | Duration                       | What was the duration of interviews and focus groups?<br><b><i>Interviews were from 30-90 minutes in duration, typically about one hour. Focus groups were 6 plus hours in duration.</i></b>                                                                                                                        |
| 22.                                   | Data Saturation                | Was data saturation discussed? <b><i>In the methods section, we describe how our sampling continued until saturation was reached</i></b>                                                                                                                                                                            |
| 23.                                   | Transcripts returned           | Were transcripts returned to participants for comment and/or correction? <b><i>Yes, we returned the transcripts, and participants contributed back in focus groups to elaborate on issues they wanted to present.</i></b>                                                                                           |
| Domain 3:<br>analysis and<br>findings |                                |                                                                                                                                                                                                                                                                                                                     |
| Data Analysis                         |                                |                                                                                                                                                                                                                                                                                                                     |
| 24.                                   | Number of Data Coders          | How many data coders coded the data?<br><b><i>Two, GKA &amp; RE</i></b>                                                                                                                                                                                                                                             |
| 25.                                   | Description of the coding tree | Did authors provide a description of the coding tree? <b><i>Yes, we coded the data by community and then by question</i></b>                                                                                                                                                                                        |
| 26.                                   | Derivation of themes           | Were themes identified in advance or derived from the data?<br><b><i>Themes were derived from the data</i></b>                                                                                                                                                                                                      |
| 27.                                   | Software                       | What software, if applicable was used to manage the data?<br><b><i>Nvivo 10</i></b>                                                                                                                                                                                                                                 |
| 28.                                   | Participant Checking           | Did participants provide feedback on the findings?<br><b><i>Yes, themes and their descriptors as well as representative quotes were presented to participants for review and to ensure experiences were reflected accordingly.</i></b>                                                                              |
| 29.                                   | Quotations presented           | Were participant quotations presented to illustrate the themes/findings? Was each quotation identified? E.g., participant number<br><b><i>Participant quotations are provided in the results to illustrate themes/findings for each question and identified by anonymized participant and community numbers</i></b> |
| 30.                                   | Data & findings consistent     | Was there consistency between the data presented and the findings? <b><i>Yes, there was consistency between data presented to and back from communities and findings as they are written</i></b>                                                                                                                    |

|     |                         |                                                                                                                                                                         |
|-----|-------------------------|-------------------------------------------------------------------------------------------------------------------------------------------------------------------------|
| 31. | Clarity of major themes | Were major themes clearly presented in the findings? <b><i>Yes. Our results present the major themes, which are presented, organized and discussed in the paper</i></b> |
| 32. | Clarity of minor themes | Is there a description of diverse cases or discussion of minor themes? Yes, minor themes are discussed in the paper                                                     |
